# Supplementary material for: Comparing Methods for the Regionalization of Intensity−Duration−Frequency (IDF) Curve Parameters in Sparsely-Gauged and Ungauged Areas of Central Chile
Source: MDPI journal article supplement (doi:10.3390/hydrology10090179), 2023-08-28
Supplement: s1 [file s1]

**Table S1.** Summary of the goodness-of-fit tests

| Station | Kriging |            |       | IDW    |            |       | Storm Index |            |       |    |
|---------|---------|------------|-------|--------|------------|-------|-------------|------------|-------|----|
|         | NSE     | SEE (mm/h) | U     | NSE    | SEE (mm/h) | U     | NSE         | SEE (mm/h) | U     | Ek |
| 1       | 0.608   | 4.505      | 0.056 | 0.791  | 3.287      | 0.097 | 0.945       | 1.683      | 0.861 | 6  |
| 2       | 0.902   | 2.095      | 0.992 | 0.979  | 0.974      | 0.599 | 0.983       | 0.876      | 0.992 | 15 |
| 3       | 0.937   | 1.842      | 0.910 | 0.921  | 2.066      | 0.359 | 0.969       | 1.289      | 0.599 | 9  |
| 4       | -0.899  | 7.291      | 0.005 | 0.562  | 3.504      | 0.261 | 0.917       | 1.523      | 0.503 | 6  |
| 5       | 0.070   | 5.679      | 0.042 | 0.907  | 1.798      | 0.543 | 0.888       | 1.967      | 0.359 | 4  |
| 6       | 0.267   | 5.366      | 0.051 | 0.892  | 2.055      | 0.571 | 0.917       | 1.805      | 0.910 | 1  |
| 7       | 0.503   | 4.418      | 0.164 | 0.895  | 2.032      | 0.628 | 0.930       | 1.664      | 0.845 | 13 |
| 8       | 0.949   | 1.533      | 0.829 | 0.946  | 1.577      | 0.477 | 0.925       | 1.863      | 0.490 | 10 |
| 9       | 0.887   | 2.183      | 0.749 | 0.916  | 1.880      | 0.734 | 0.918       | 1.856      | 0.585 | 15 |
| 10      | 0.531   | 4.012      | 0.516 | 0.005  | 5.843      | 0.054 | 0.898       | 1.868      | 0.503 | 8  |
| 11      | -0.598  | 14.020     | 0.000 | -0.596 | 14.011     | 0.000 | 0.943       | 2.657      | 0.613 | 16 |
| 12      | 0.832   | 2.721      | 0.464 | 0.873  | 2.364      | 0.813 | 0.940       | 1.620      | 0.734 | 8  |
| 13      | 0.678   | 3.898      | 0.158 | 0.681  | 3.882      | 0.146 | 0.948       | 1.560      | 0.845 | 7  |
| 14      | 0.950   | 1.538      | 0.942 | 0.841  | 2.741      | 0.348 | 0.939       | 1.696      | 0.543 | 3  |
| 15      | 0.845   | 2.499      | 0.942 | 0.844  | 2.513      | 0.992 | 0.980       | 0.910      | 0.975 | 2  |
| 16      | 0.652   | 4.754      | 0.042 | 0.576  | 5.246      | 0.025 | 0.940       | 1.977      | 0.599 | 11 |
| 17      | 0.987   | 0.923      | 0.861 | 0.874  | 2.834      | 0.348 | 0.867       | 2.923      | 0.557 | 25 |
| 18      | 0.875   | 3.301      | 0.228 | 0.976  | 1.434      | 0.643 | 0.998       | 0.409      | 0.910 | 20 |
| 19      | 0.886   | 3.503      | 0.359 | 0.979  | 1.502      | 0.926 | 0.922       | 2.899      | 0.749 | 29 |
| 20      | 0.733   | 5.107      | 0.097 | 0.798  | 4.448      | 0.140 | 0.998       | 0.427      | 0.893 | 18 |
| 21      | 0.950   | 1.640      | 0.658 | 0.802  | 3.274      | 0.370 | 0.970       | 1.272      | 0.734 | 22 |

|                    |       |       |       |       |       |       |       |       |       |    |
|--------------------|-------|-------|-------|-------|-------|-------|-------|-------|-------|----|
| 22                 | 0.950 | 1.807 | 0.427 | 0.981 | 1.123 | 0.813 | 0.975 | 1.276 | 0.749 | 21 |
| 23                 | 0.919 | 2.588 | 0.212 | 0.971 | 1.557 | 0.734 | 0.949 | 2.043 | 0.543 | 24 |
| 24                 | 0.894 | 3.085 | 0.177 | 0.989 | 0.991 | 0.910 | 0.942 | 2.292 | 0.571 | 23 |
| 25                 | 0.924 | 2.907 | 0.571 | 0.804 | 4.663 | 0.089 | 0.916 | 3.048 | 0.599 | 17 |
| 26                 | 0.702 | 3.223 | 0.734 | 0.567 | 3.886 | 0.427 | 0.595 | 3.758 | 0.643 | 19 |
| 27                 | 0.647 | 3.792 | 0.220 | 0.465 | 4.669 | 0.197 | 0.985 | 0.780 | 0.845 | 31 |
| 28                 | 0.986 | 1.043 | 0.673 | 0.968 | 1.588 | 0.477 | 0.659 | 5.161 | 0.197 | 27 |
| 29                 | 0.976 | 1.155 | 0.734 | 0.975 | 1.190 | 0.599 | 0.868 | 2.713 | 0.703 | 19 |
| 30                 | 0.915 | 1.965 | 0.942 | 0.917 | 1.932 | 0.861 | 0.978 | 1.006 | 0.749 | 29 |
| 31                 | 0.672 | 3.520 | 0.452 | 0.565 | 4.051 | 0.415 | 0.983 | 0.802 | 0.813 | 27 |
| Average            | 0.682 | 3.481 |       | 0.763 | 3.062 |       | 0.922 | 1.859 |       |    |
| Variation<br>Coef. | 0.645 | 0.711 |       | 0.431 | 0.796 |       | 0.094 | 0.539 |       |    |

**Table S2.** Summary of data availability for each station in this study.

| <b>Rain gauges</b>  | <b>Start year</b> | <b>End year</b> | <b>Number of years</b> |
|---------------------|-------------------|-----------------|------------------------|
| Curicó              | 1966              | 2009            | 40                     |
| Los Queñes          | 1971              | 2009            | 39                     |
| Potrero Grande      | 1971              | 2009            | 38                     |
| Pencahue            | 1974              | 2009            | 36                     |
| Talca               | 1982              | 2009            | 28                     |
| San Javier          | 1974              | 2009            | 36                     |
| Melozal             | 1971              | 2009            | 35                     |
| Colorado            | 1969              | 2009            | 40                     |
| El Lirio-Maule      | 1968              | 1994            | 27                     |
| Casa de Máquinas    | 1964              | 2000            | 30                     |
| Melado en la Lancha | 1966              | 1993            | 25                     |
| Embalse Ancoa       | 1971              | 2009            | 38                     |
| Parral              | 1974              | 2009            | 36                     |
| Embalse Digua       | 1971              | 2009            | 39                     |
| San Manuel          | 1995              | 2009            | 15                     |
| Embalse Bullileo    | 1971              | 2009            | 39                     |
| Chillán Viejo       | 1974              | 2009            | 36                     |

|                       |      |      |    |
|-----------------------|------|------|----|
| Chillán               | 1974 | 2009 | 30 |
| Embalse Coihueco      | 1971 | 2009 | 38 |
| Caracol               | 1987 | 2009 | 23 |
| La Punilla            | 1965 | 1986 | 20 |
| Diguillín             | 1965 | 2009 | 45 |
| Hualpencillo          | 1946 | 1963 | 13 |
| Carriel Sur           | 1966 | 2009 | 44 |
| Bellavista            | 1965 | 1988 | 22 |
| Polcura en Balseadero | 1959 | 2000 | 40 |
| Los Ángeles           | 1995 | 2009 | 15 |
| Quilaco               | 1965 | 2009 | 45 |
| Cerro el Padre        | 1970 | 2009 | 40 |
| Troyo                 | 1968 | 1994 | 27 |
| Contulmo              | 1987 | 2009 | 21 |

---

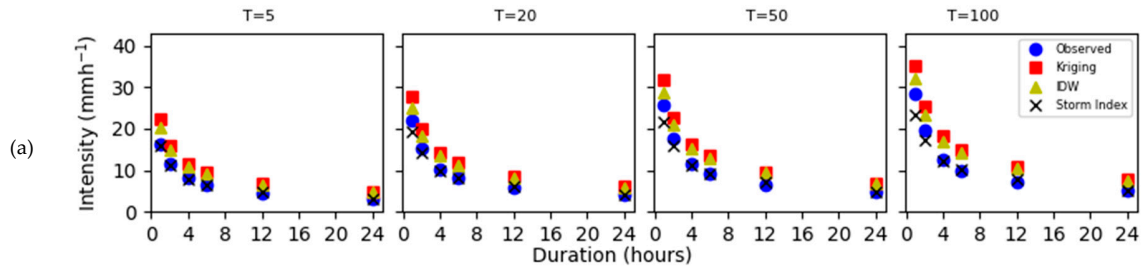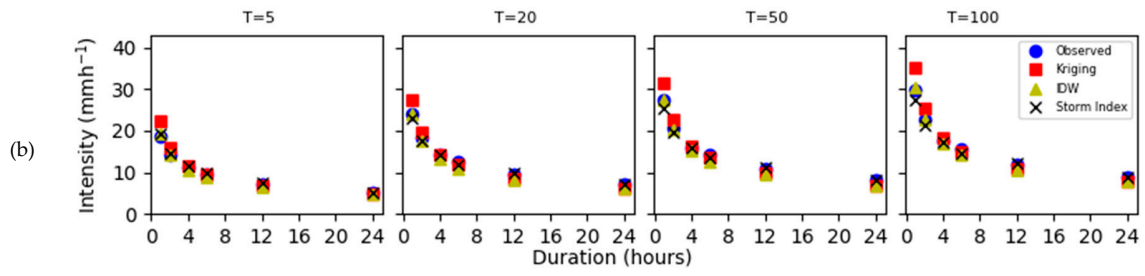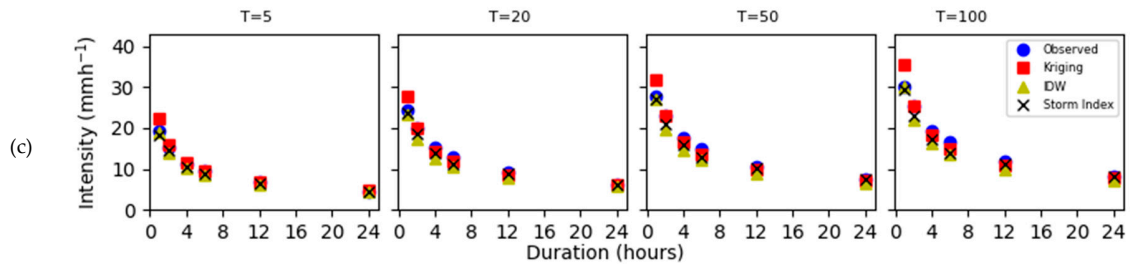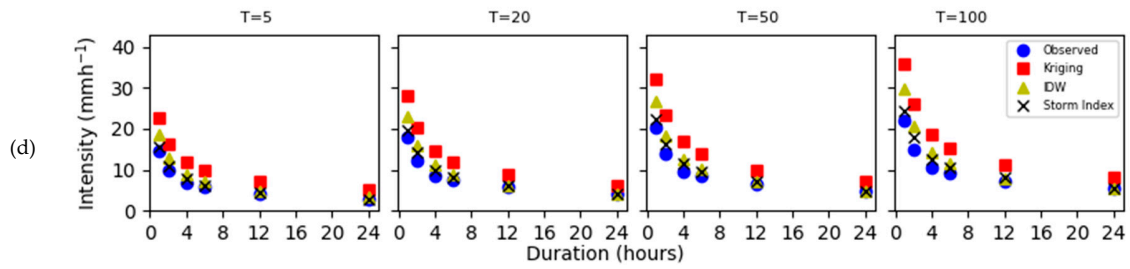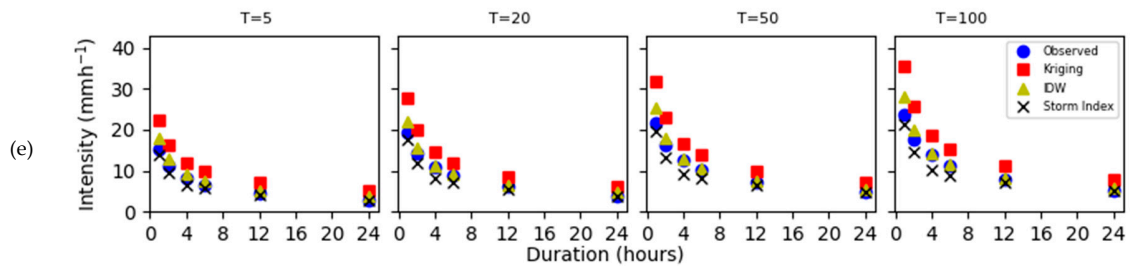

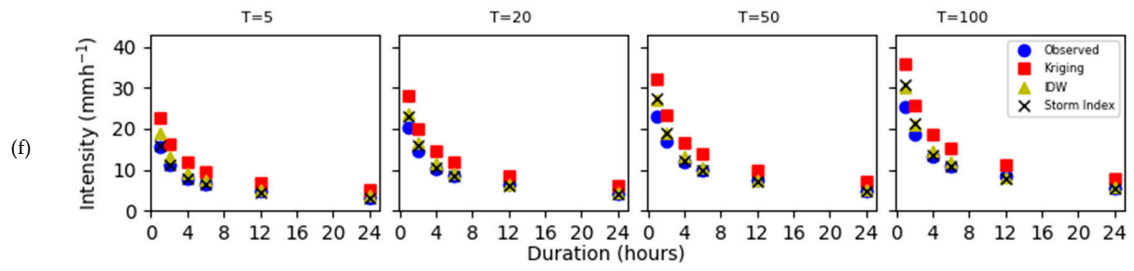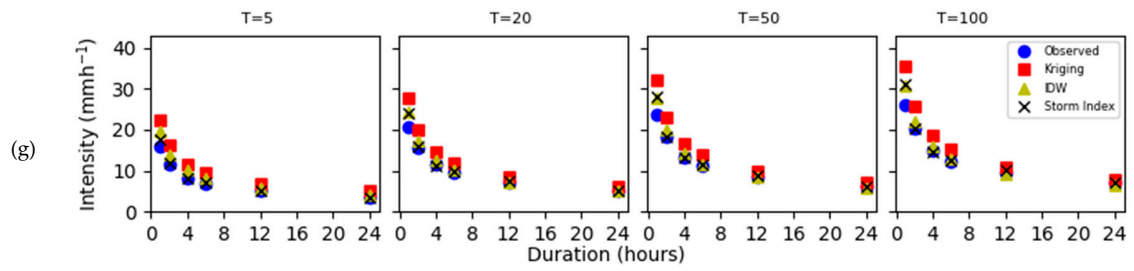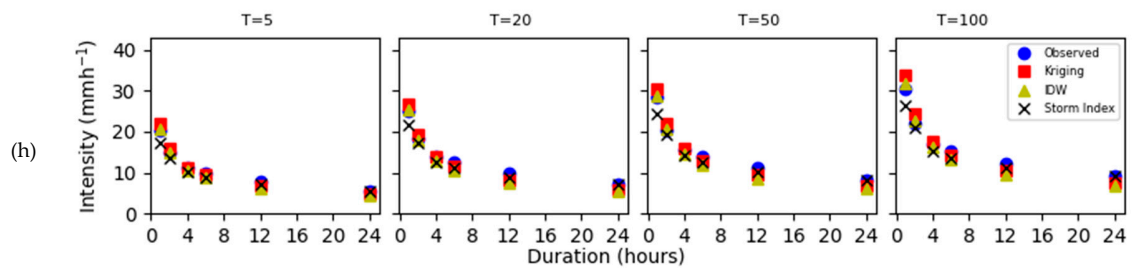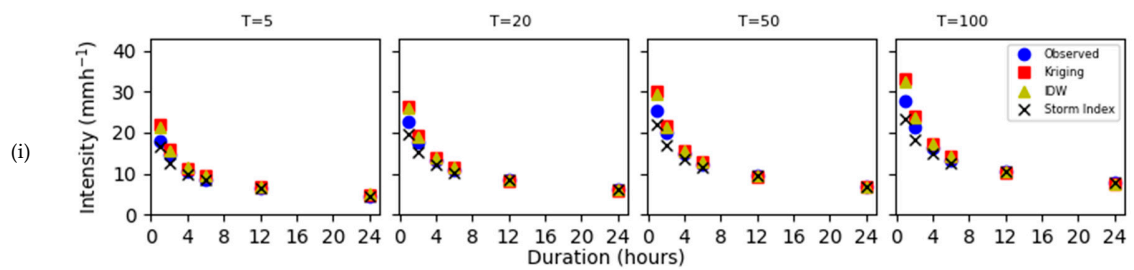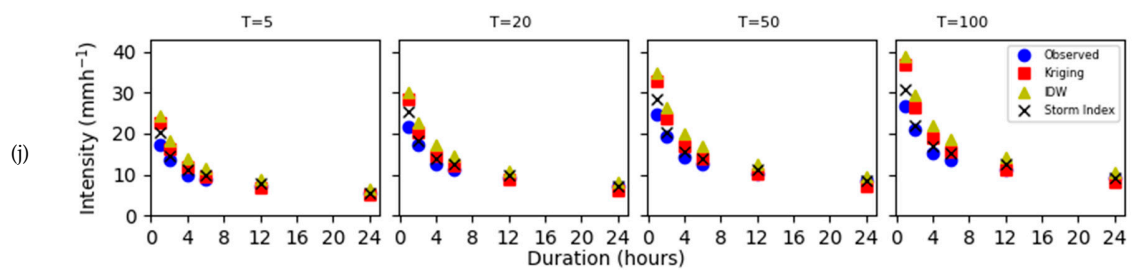

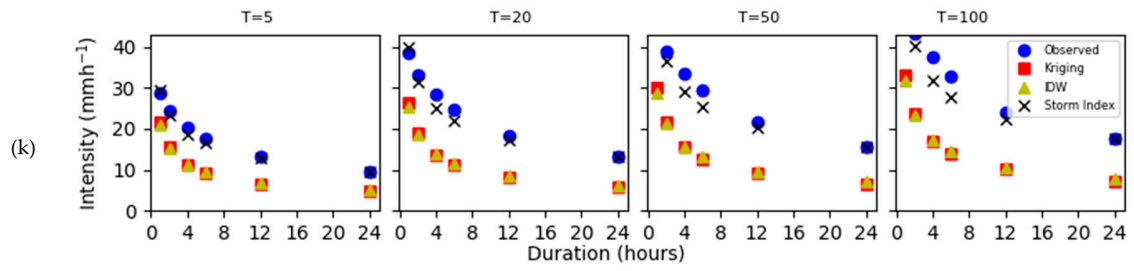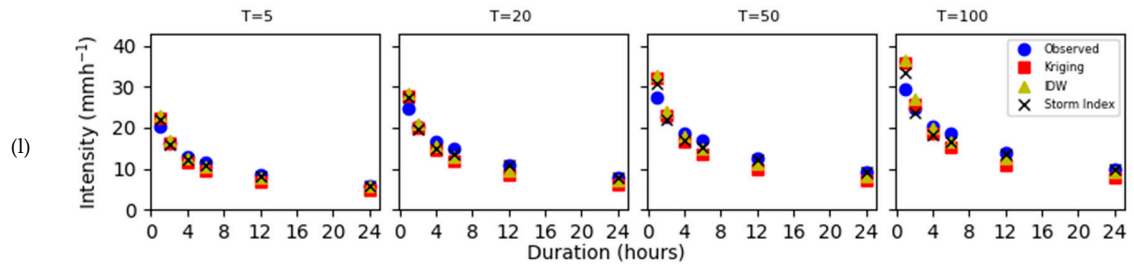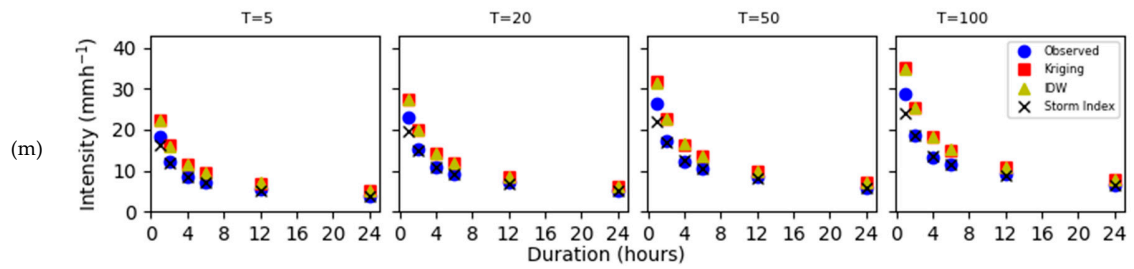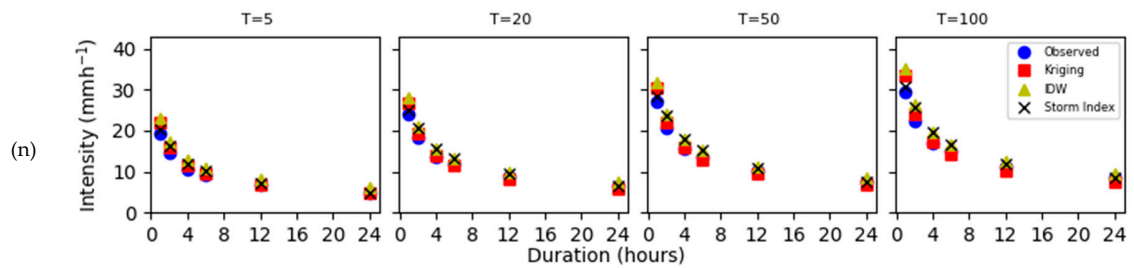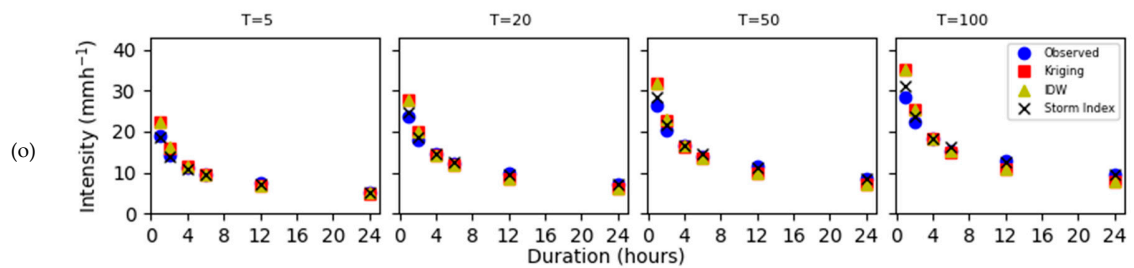

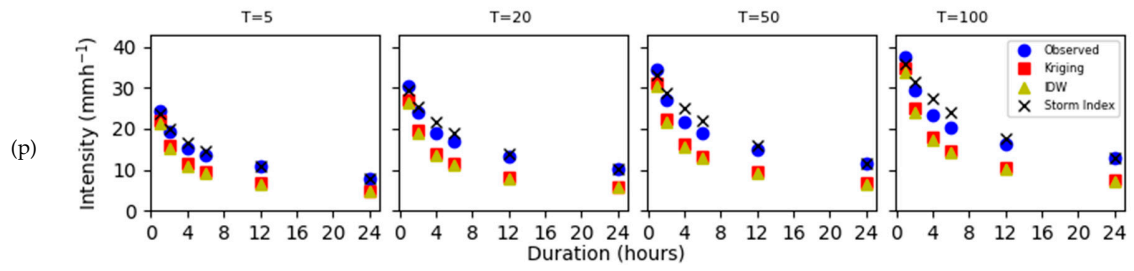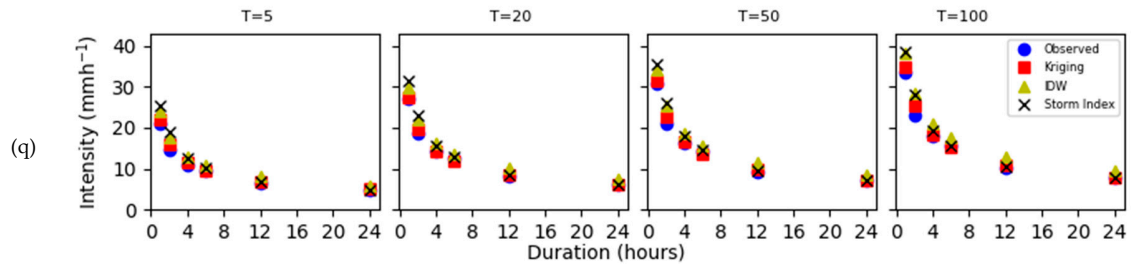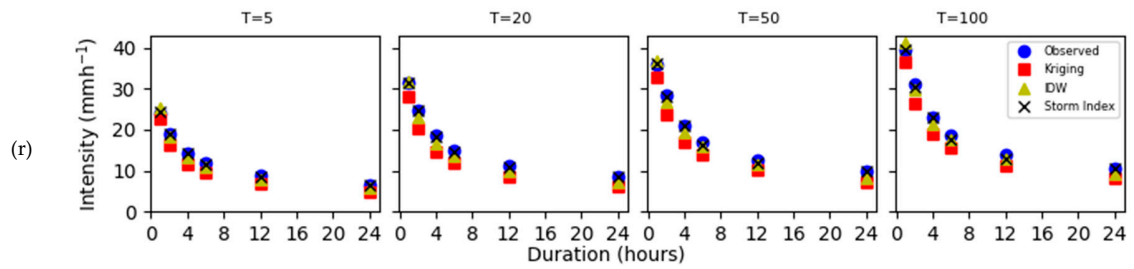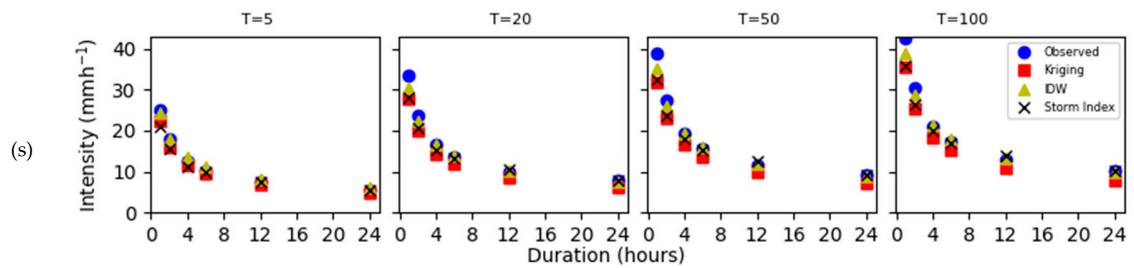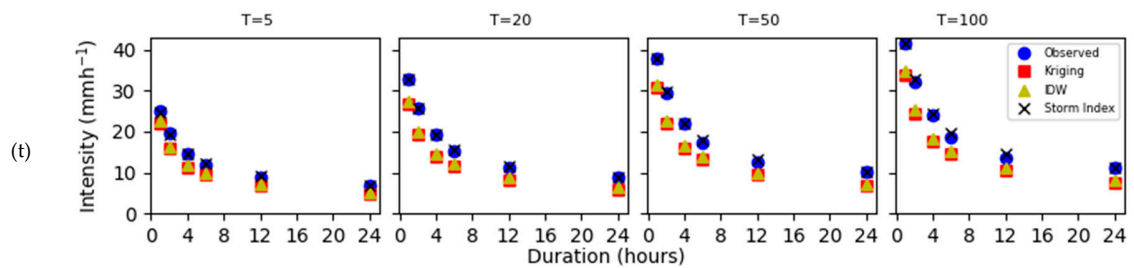

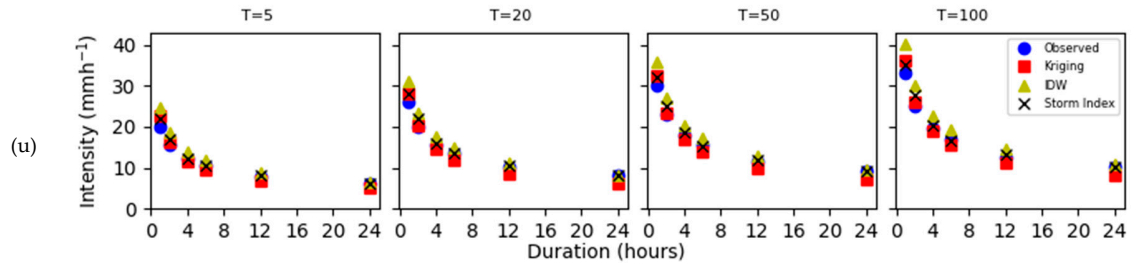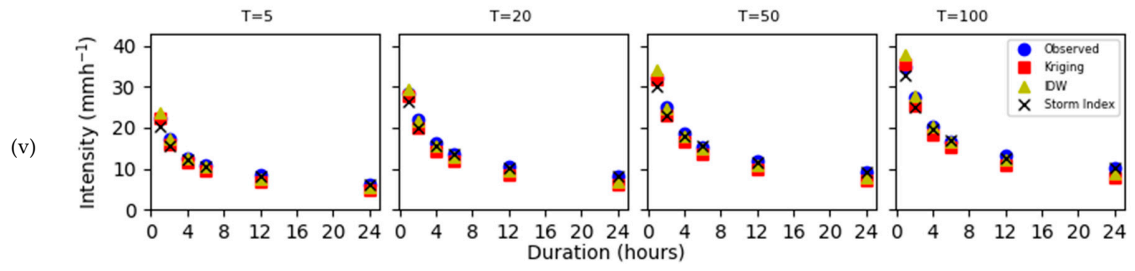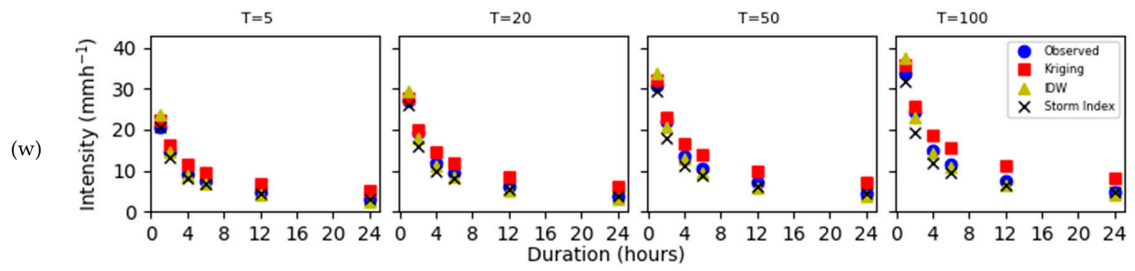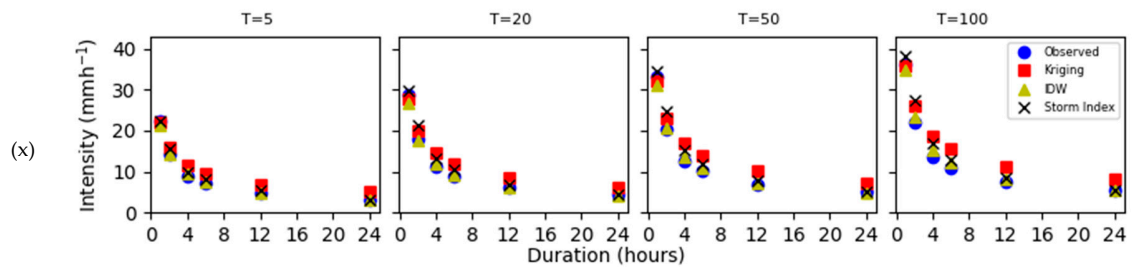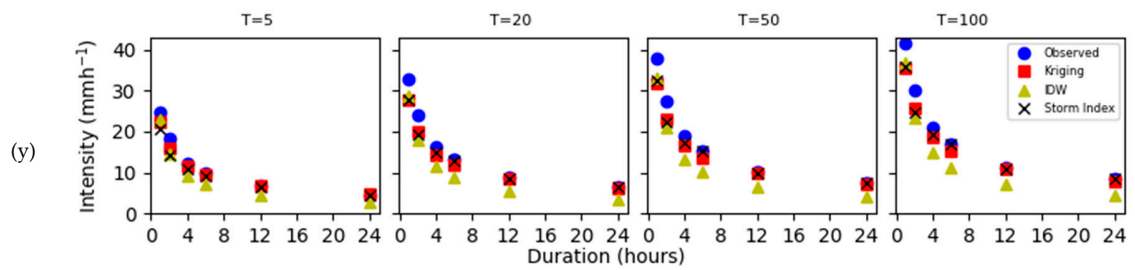



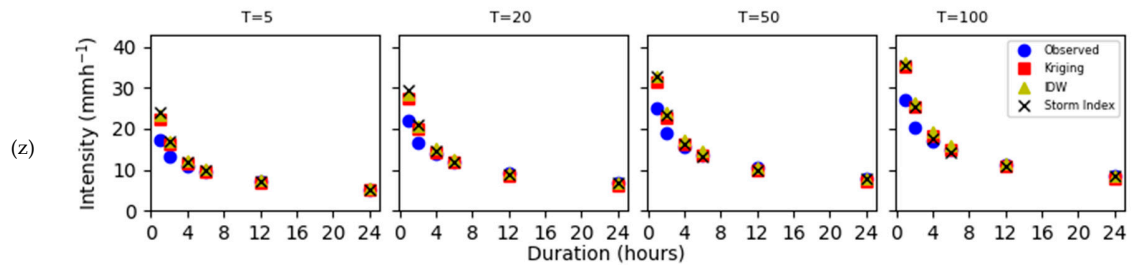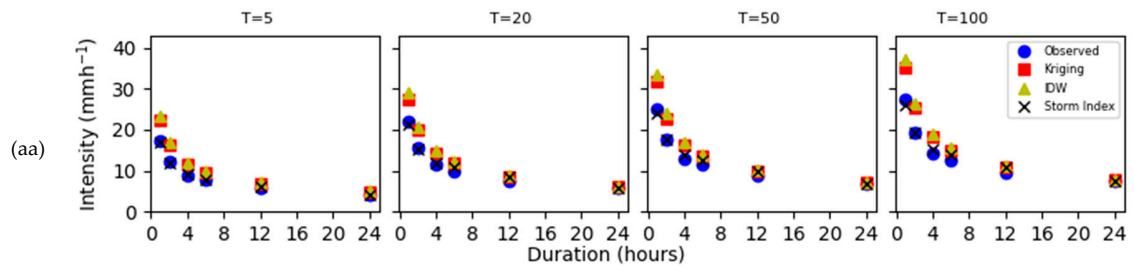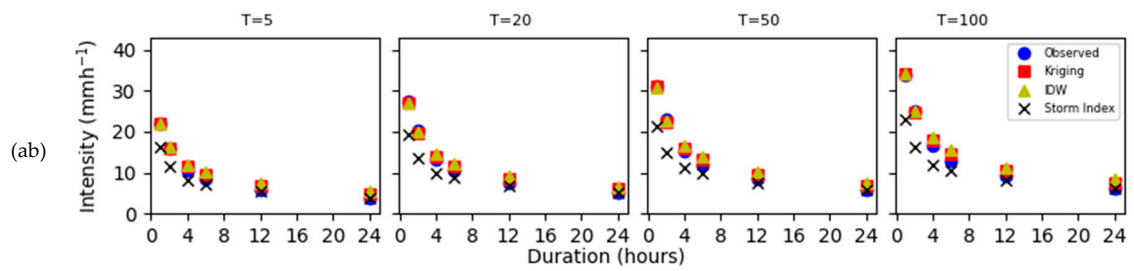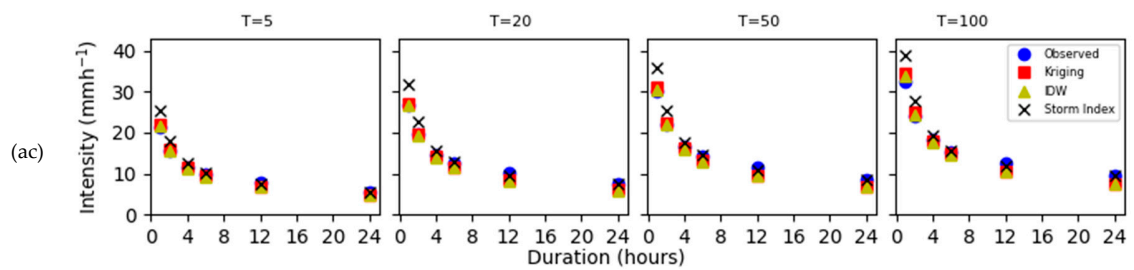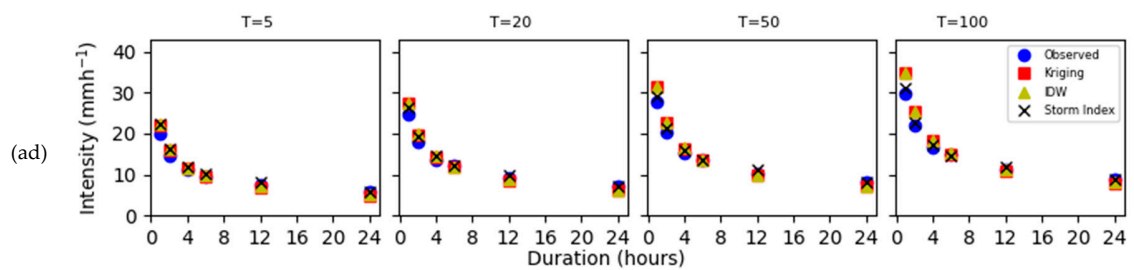

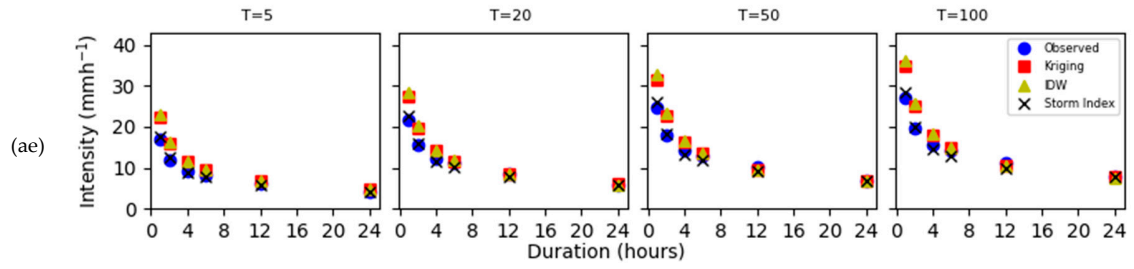

**Figure S1.** Boxplots of intensities for the following stations: (a) Curicó, (b) Los Queñes, (c) Potrero Grande, (d) Pencahue, (e) Talca, (f) San Javier, (g) Melozal, (h) Colorado, (i) El Lirio-Maule, (j) Casa de Máquinas, (k) Melado en la lancha, (l) Embalse Ancoa, (m) Parral, (n) Embalse Digua, (o) San Manuel, (p) Embalse Bullileo, (q) Chillán Viejo, (r) Chillán, (s) Embalse Coihueco, (t) Caracol, (u) La Punilla, (v) Diguillín, (w) Hualpencillo, (x) Carriel Sur, (y) Bellavista, (z) Polcura en Balseadero, (aa) Los Angeles, (ab) Quilaco, (ac) Cerro el Padre, (ad) Troyo, and (ae) Contulmo.

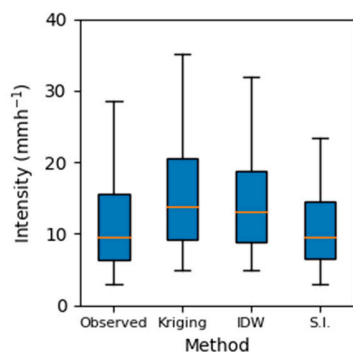

(a)

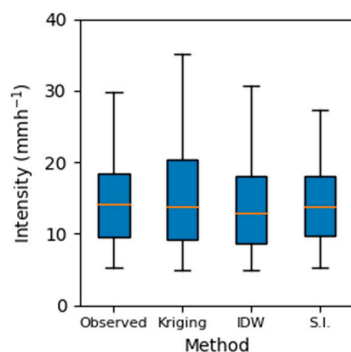

(b)

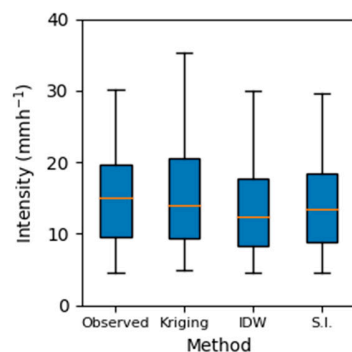

(c)

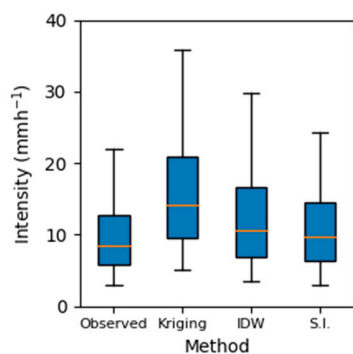

(d)

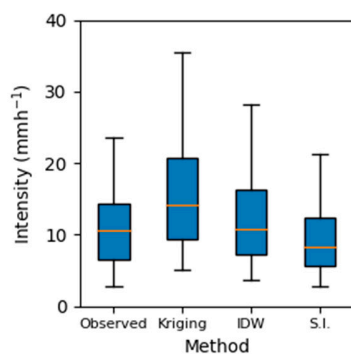

(e)

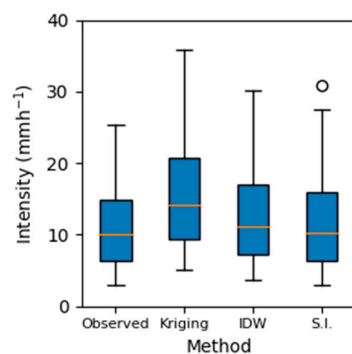

(f)

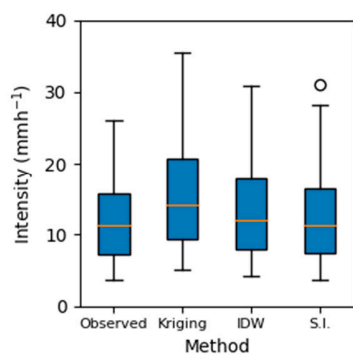

(g)

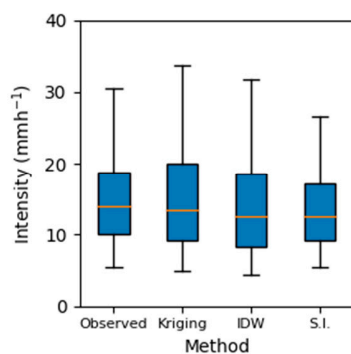

(h)

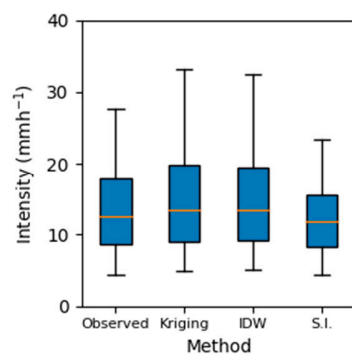

(i)

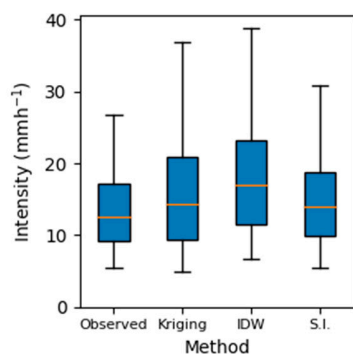

(j)

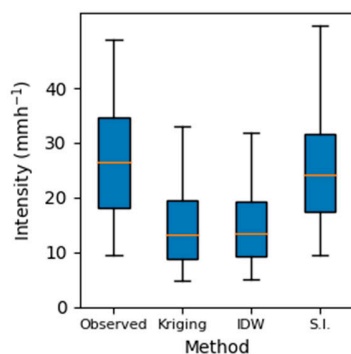

(k)

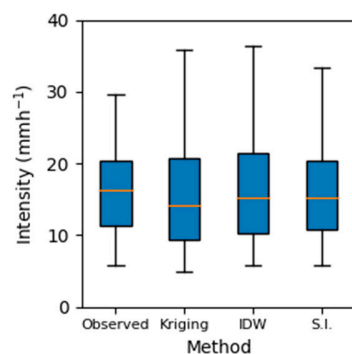

(l)

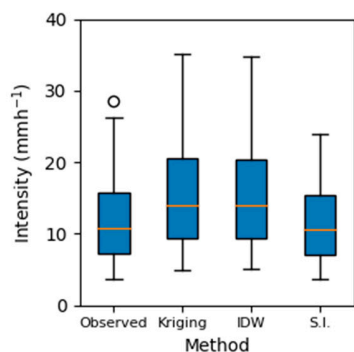

(m)

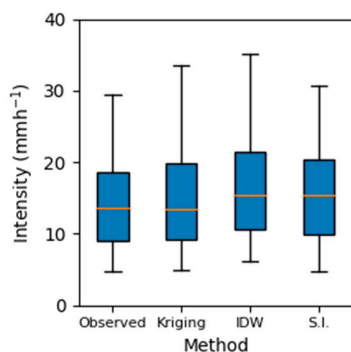

(n)

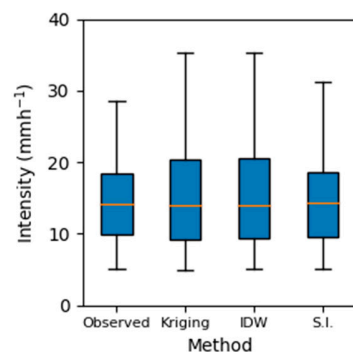

(o)

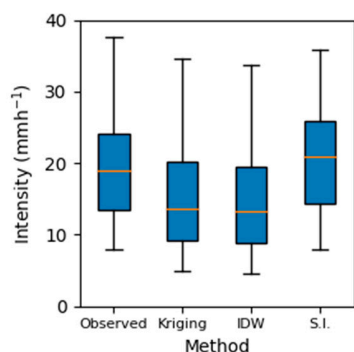

(p)

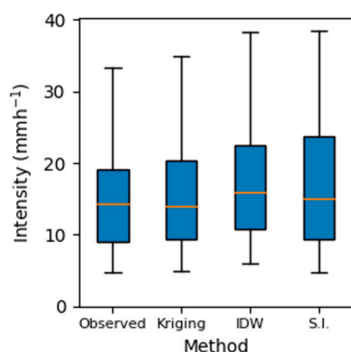

(q)

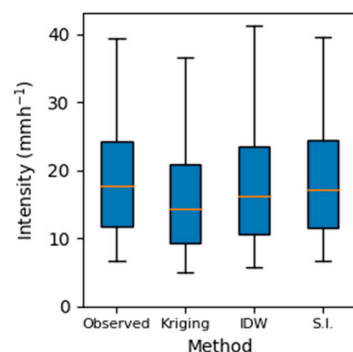

(r)

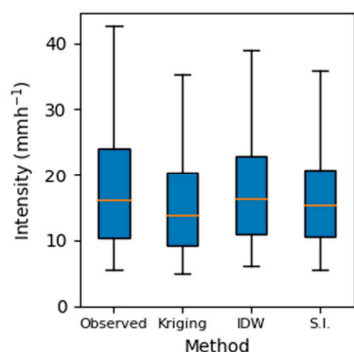

(s)

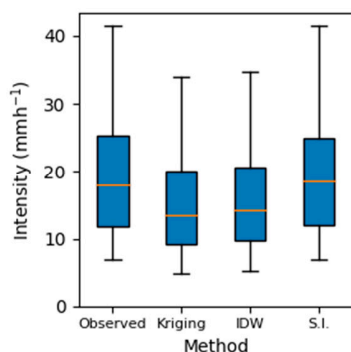

(t)

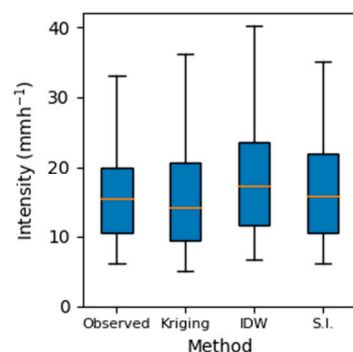

(u)

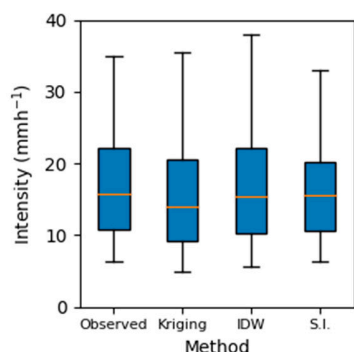

(v)

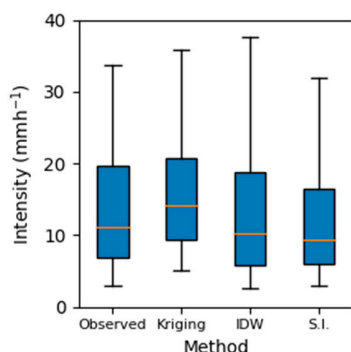

(w)

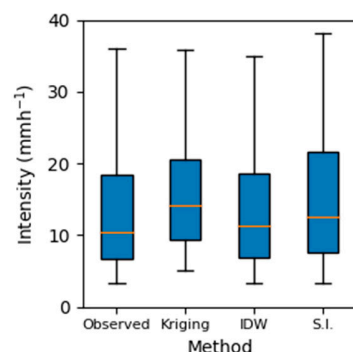

(x)

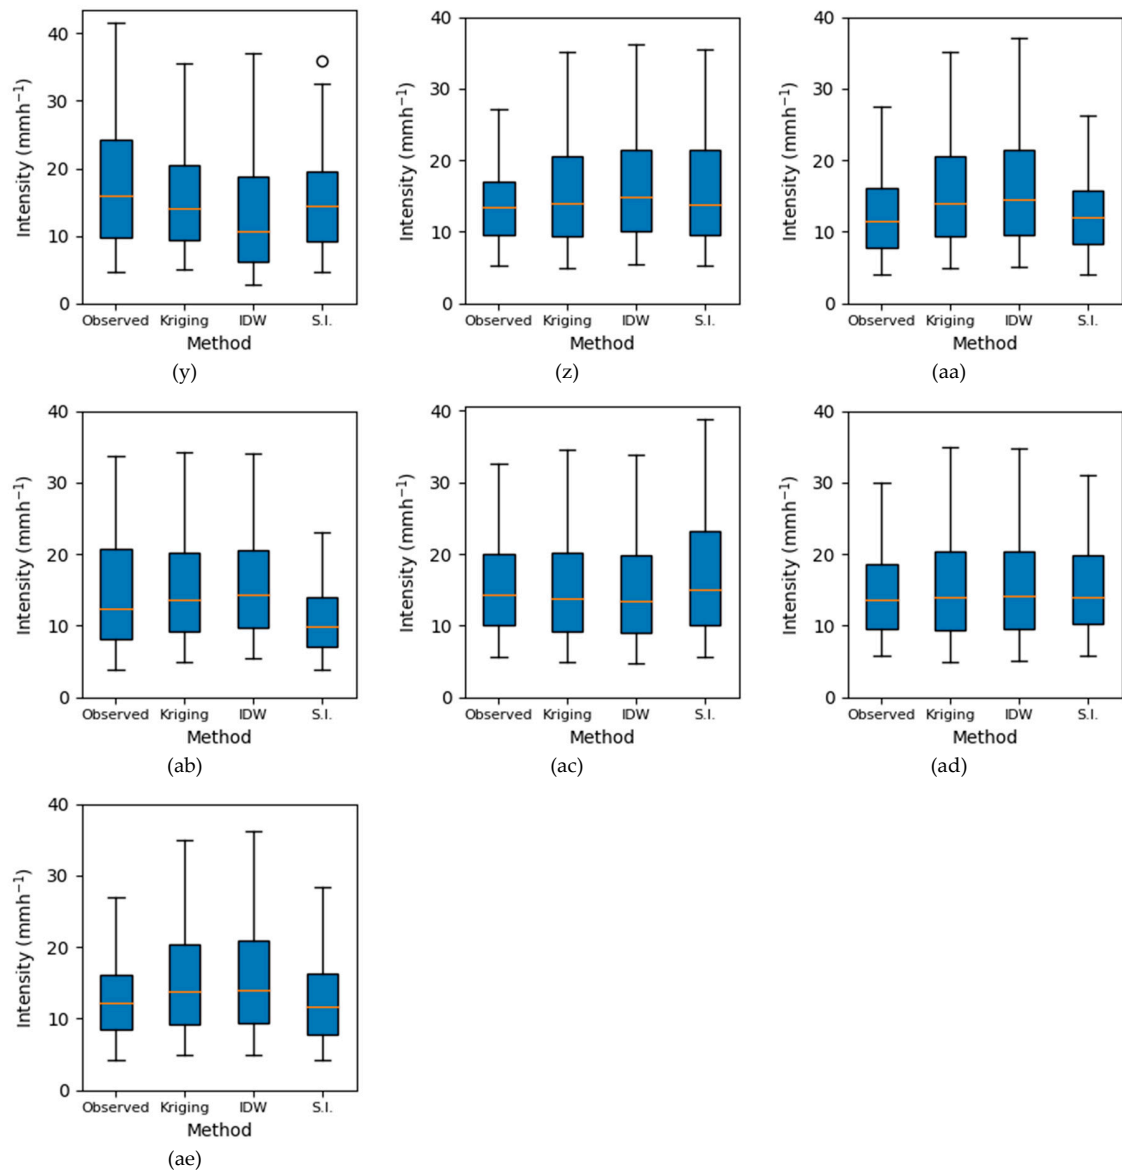

**Figure S2.** Boxplots of intensities for the following stations: (a) Curicó, (b) Los Queñes, (c) Potrero Grande, (d) Pencahue, (e) Talca, (f) San Javier, (g) Melozal, (h) Colorado, (i) El Lirio-Maule, (j) Casa de Máquinas, (k) Melado en la lancha, (l) Embalse Ancoa, (m) Parral, (n) Embalse Digua, (o) San Manuel, (p) Embalse Bullileo, (q) Chillán Viejo, (r) Chillán, (s) Embalse Coihueco, (t) Caracol, (u) La Punilla, (v) Diguillín, (w) Hualpencillo, (x) Carriel Sur, (y) Bellavista, (z) Polcura en Balseadero, (aa) Los Angeles, (ab) Quilaco, (ac) Cerro el Padre, (ad) Troyo, and (ae) Contulmo.
